# Supplementary material
Source: Springer Nature journal article supplement (https://www.springermedizin.de/resource/supplementary/12879_2009_1244_MOESM3_ESM.pdf/9442170)

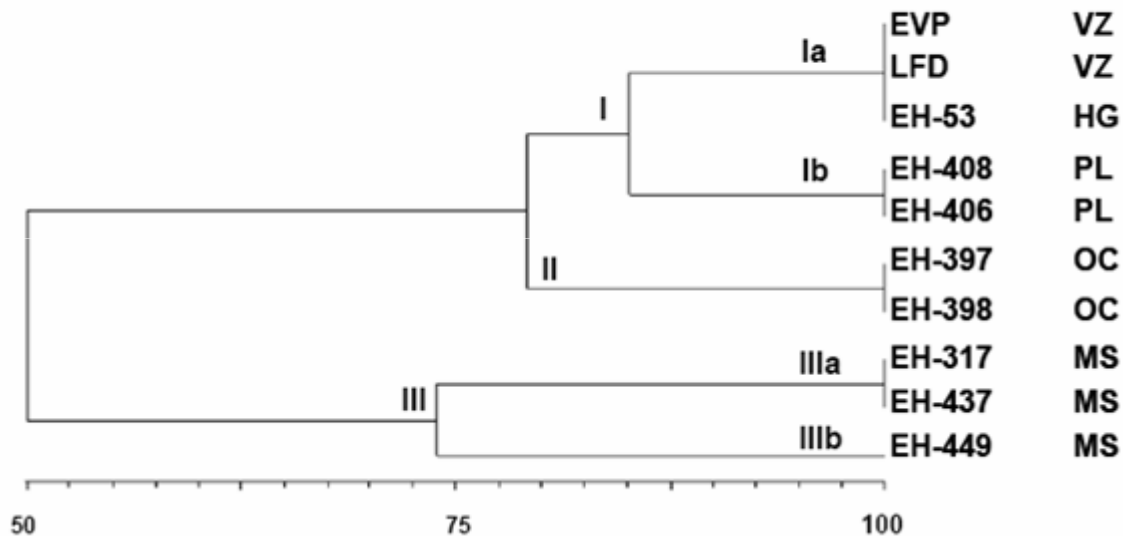

**Percentage similarity**

Supplement: MOESM3 [file 9442170]
